# Supplementary material for: An Optimized CoBRA Method for the Microfluidic Electrophoresis Detection of Breast Cancer Associated RASSF1 Methylation
Source: MDPI journal article supplement (doi:10.3390/biotech12010007), 2023-01-09

# Supplementary Material: An optimized CoBRA-LabChip method for the microfluidic detection of breast cancer-associated DNA methylation

**Table S1.** Singleplex primer optimization experiments. Results of using different primer sequences to amplify target regions of various breast cancer-implicated genes.

| Primer   | Gene          | Sequence, Fwd. (5'-3')                            | Sequence, Rev. (5'-3')                      | Expected amplicon length (bp) | Annealing temperature (°C) | Results                                     |
|----------|---------------|---------------------------------------------------|---------------------------------------------|-------------------------------|----------------------------|---------------------------------------------|
| <b>A</b> | <i>RASSF1</i> | GGG TTT TAT AGT<br>TTT TGT ATT TAG<br>GTT TTT ATT | CCG CAA CTC<br>AAT AAA CTC<br>AAA CT        | 204                           | 56                         | Successful amplification                    |
| <b>B</b> | <i>RASSF1</i> | GGG TTT TAT AGT<br>TTT TGT ATT TAG<br>GTT TTT A   | CTC AAT AAA<br>CTC AAA CTC<br>CCC CAA CAT A | 198                           | 56                         | Successful amplification                    |
| <b>C</b> | <i>FOXA1</i>  | GGT TTT TGT TTG<br>GTA TTT TTT TTG<br>TAG T       | ACC TAC AAC<br>TAA AAA CAA<br>ATA AAT CAC A | 371                           | 56                         | Unsuccessful amplification of target region |
| <b>D</b> | <i>GSTP1</i>  | TTT TGT TGG GGA<br>TTT GGG AAA                    | AAA AAA ACA<br>CCC TAA AAT<br>CCC C         | 81                            | 56                         | Successful amplification                    |
| <b>E</b> | <i>GSTP1</i>  | GGG AAA GAG<br>GGA AAG GTT<br>TTT TT              | CAA AAA AAC<br>ACC CTA AAA<br>TCC C         | 67                            | 56                         | Successful amplification but lower yield    |
| <b>F</b> | <i>GSTP1</i>  | AAA GAG GGA<br>AAG GTT TTT TTG<br>GTT A           | CAA AAA AAC<br>ACC CTA AAA<br>TCC C         | 64                            | 56                         | Successful amplification                    |
| <b>G</b> | <i>GSTP1</i>  | GGA GGT TGA<br>AGT AGA ATT<br>GTT TGA AT          | CCC ACT TCA<br>CAA AAC AAA<br>AAA AA        | 268                           | 56                         | Unsuccessful amplification of target region |
| <b>H</b> | <i>GSTP1</i>  | ATA ATT TTA TTT<br>ATT CGG GAG<br>GTT GAA G       | CGC TAT AAC<br>CCA AAC TAA<br>AAT ACA ATA A | 109                           | 56                         | Unsuccessful amplification of target region |
| <b>I</b> | <i>GSTP1</i>  | TTA TAA TTT TAT<br>TTA TTC GGG<br>AGG TTG A       | ACG CTA TAA<br>CCC AAA CTA<br>AAA TAC AAT   | 112                           | 56                         | Unsuccessful amplification of target region |

**Figure S1.** Representative electropherogram of singleplex experiments. Electropherogram resulting from using primer set D to amplify (a) methylated (M), and (b) unmethylated (UM) DNA. The electropherograms corresponding to amplified *GSTP1* regions displayed amplification at 85 and 86 bp for the 100% M-DNA (a) and 100% UM-DNA (b), respectively, which falls within the desired region of  $81 \pm 10\%$ .

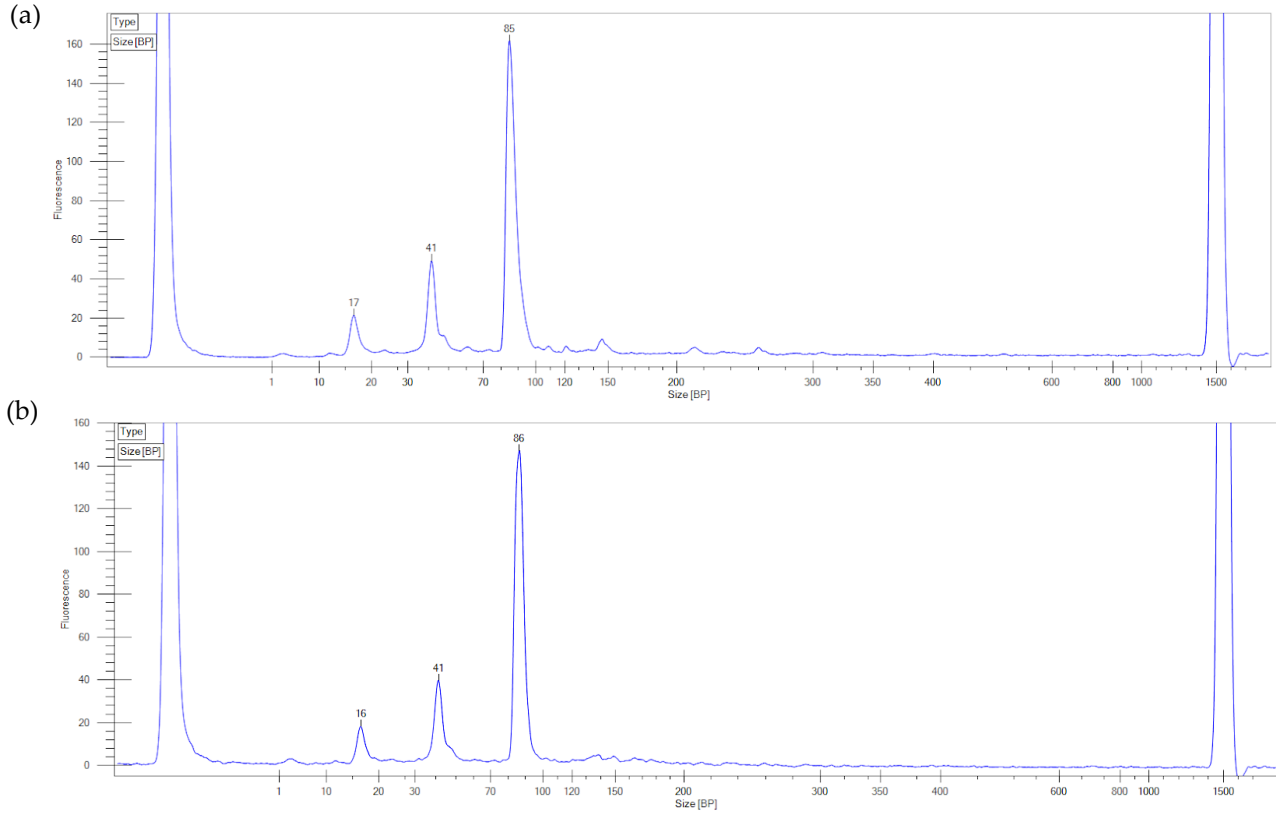

Supplement: s1 [file s1]
